# Supplementary material for: Outcome of a Randomized Study of a Mental Health Peer Education and Support Group in the VA
Source: Atypon-hosted journal article supplement (doi:10.1176/appi.ps.201100348), 2012-12-01
Supplement: 1243_ds001.pdf [file 1243_ds001.pdf]

### **Additional References**

- Ahern L Fisher D. Recovery at your own pace. *Journal of Psychosocial Nursing* 39, 22-32, 2001
- American Psychiatric Association. *Diagnostic and statistical manual of mental disorders*. (4th ed.). Washington DC: American Psychiatric Association, 1994
- Anthony W, Cohen M, Farkas M. et al: *Psychiatric Rehabilitation*, 2<sup>nd</sup> edition. Boston: Boston University Center for Psychiatric Rehabilitation, 2002
- Burti L, Amaddeo F, Ambros,M, et al: Does additional care provided by a consumer self-help group improve psychiatric outcome? A study in an Italian community-based psychiatric service. *Community Mental Health Journal* 41:705-720, 2005
- Campbell J, Leaver J. *Emerging new practices in organized peer support*. US Dept. of Health & Human Services. Substance Abuse & Mental Health Services Admin. Center for Mental Health Services 2003
- Castelein S, Bruggeman R, van Busschbach, J, et al: The effectiveness of peer support groups in psychosis: a randomized controlled trial. *Acta Psychiatrica Scandinavica*, 118:64-72, 2008
- Chinman MJ, Rosenheck R, Lam JA, et al: Comparing consumer and nonconsumer provided case management services for homeless persons with serious mental illness. *Journal of Nervous & Mental Disease* 188:446-453, 2000
- Clarke G, Herinckx H, Kinney R, et al: Psychiatric hospitalizations, arrests, emergency room visits and homelessness of clients with serious and persistent mental illness: Findings from a randomized trial of two ACT programs vs. usual care. *Mental Health Services Research* 2:155-164, 2000

- Cook J, Copeland M, Hamilton M, et al: Initial outcomes of a mental illness self-management program based on wellness recovery action planning. *Psychiatric Services* 60:246-249, 2009
- Corrigan PW, Giffort D, Rashid F, et al: Recovery as a psychological construct. *Community Mental Health Journal* 35:231-239, 1999
- Davidson L, Chinman MJ, Kloos B, et al: Peer support among individuals with severe mental illness: a review of the evidence. *Clinical Psychology: Science and Practice* 6:165–187, 1999
- Davidson L, Chinman M, Sells D, et al: Peer support among adults with serious mental illness: a report from the field. *Schizophrenia Bulletin* 32:443-450, 2006
- Davidson L, Shahar G, Stayner D, et al: Supported socialization for people with psychiatric disabilities: Lessons from a randomized controlled trial. *Journal of Community Psychology* 32:453-477, 2004
- Davison KP, Pennebaker JW, Dickerson SS: Who Talks: The social psychology of illness support groups. *American Psychologist* 55:205-217, 2011
- Doughty C, Tse S: Can consumer-led mental health services be equally effective? An integrative review of CLMH services in high-income countries. *Community Mental Health Journal* 47:252-266, 2010
- Eisen SV, Normand SLT, Belanger A, et al: The revised Behavior and Symptom Identification Scale (BASIS-24): reliability and validity. *Medical Care* 42:1230-1241, 2004

- Felton CJ, Stastny P, Shern D, et al: Consumers as peer specialists on intensive case management teams: impact on client outcomes. *Psychiatric Services* 46:1037–1044, 1995
- First MB, Spitzer RL, Gibbon M, et al: Structured Clinical Interview for DSM-IV Axis I Disorders (Patient Edition, Version 2). New York: Biometrics Research Department, New York State Psychiatric Institute 1997
- Fitzmaurice GM, Laird NM, Ware J.H. *Applied Longitudinal Analysis*. John Wiley & Sons, Hoboken, NJ 2004
- Gelman A, Hill J. *Data Analysis Using Regression and Multilevel/Hierarchical Models*. Cambridge University Press, New York, NY 2007
- Goldberg R, Resnick S. US Department of Veterans Affairs (VA) efforts to promote psychosocial rehabilitation and recovery. *Psychiatric Rehabilitation Journal* 33:255-258, 2010
- Greenfield T, Stoneking B, Humphreys K, et al: A randomized trial of a mental health consumer-managed alternative to civil commitment for acute psychiatric crisis. *American Journal of Community Psychology* 42:135-144, 2008
- Hebert M, Rosenheck R, Drebing C, et al: Integrating peer support initiatives in a large healthcare organization. *Psychological Services* 5:216-227, 2008
- Hibbard JH, Stockard J, Mahoney ER, et al: Development of the Patient Activation Measure (PAM): Conceptualizing and measuring activation in patients and consumers. *Health Services Research* 39:1005-1024, 2004

Kazis LE, Miller DR, Clark JA et al.: Improving the response choices on the veterans SF-36 health survey role functioning scales: results from the Veterans Health Study.

Journal of Ambulatory Care Management. 27:263-80, 2004

Littell RC, Milliken GA, Stroup WW et al: *SAS System for Mixed Models*. SAS Institute Inc. Cary, NC 1996

New Freedom Commission on Mental Health. Achieving the promise: Transforming mental health care in America, Executive Summary [Publ. No. SMA-03-3831]. Rockville, MD: DHHS 2003

O'Donnell M, Parker G, Proberts M et al: A study of client-focused case management and consumer advocacy: the community and consumer service project. Australian & New Zealand Journal of Psychiatry 33:684-693, 1999

Paulson R, Herinckx H, Demmler J, et al: Comparing practice patterns of consumer and non-consumer mental health service. Community Mental Health Journal 35:251-269, 1999

Perlin J, Kazis LE, Skinner KM et al: Health status and outcomes of veterans: physical and mental component summary scores. Veterans SF-36. 1999 large health survey of veteran enrollees. Executive Report. Office of Quality and Performance, VHA Dept. of Veterans Affairs, Washington, DC May, 2000

Pfeiffer PN, Heisler M, Piette JD et al. Efficacy of peer support interventions for depression: a meta-analysis. General Hospital Psychiatry 33:29-36, 2011

Resnick S, Armstrong M, Sperrazza M, et al: A model of consumer-provider partnership: Vet-to-Vet. Psychiatric Rehabilitation Journal 28:185-187, 2004

Resnick S, Rosenheck R. Integrating peer-provided services: A quasi-experimental study of recovery orientation, confidence, and empowerment. *Psychiatric Services* 59:1307-1314, 2008

Ridgway P, McDiarmid D, Davidson L et al: Pathways to Recovery: A strengths recovery self-help workbook. Lawrence, KS, University of Kansas School of Social Welfare. 2002

Rogers ES, Chamberlin J, Ellison ML, et al: A consumer-constructed scale to measure empowerment among users of mental health services. *Psychiatric Services* 48:1042-1047, 1997

Rogers S, Teague G, Lichenstein C, et al: Effects of participation in consumer-operated service programs on both personal and organizationally mediated empowerment: Results of multisite study. *Journal of Rehabilitation Research & Development* 44:785-800, 2007

Segal S, Silverman C, Temkin T. Self-help and community mental health agency outcomes: a recovery-focused randomized controlled trial. *Psychiatric Services* 61:905-10, 2010

Segal SP, Silverman C, Temkin T. Empowerment and self-help agency practice for people with mental disabilities. *Social Work*, 38:705-712, 1993

Segal SP, Silverman CJ, Temkin TI. Outcomes from consumer-operated and community mental health services: a randomized controlled trial. *Psychiatric Services* 62:915-921, 2011

- Sells D, Davidson L, Jewell C, et al: The treatment relationship in peer-based and regular case management for clients with severe mental illness. *Psychiatric Services* 57:1179–1184, 2006
- Sherbourne CD, Stewart AL: The MOS Social Support Survey. *Social Science & Medicine* 32:705-714, 1991
- Solomon P, Draine J: The efficacy of a consumer case management team: Two year outcomes of a randomized trial. *Journal of Mental Health Administration* 22:126-134, 1995
- Solomon P, Draine J. The state of knowledge of the effectiveness of consumer provided services. *Psychiatric Rehabilitation Journal*, 25, 20-27, 2001
- Snyder CR, Harris C, Anderson JR, et al: The will and the ways: development and validation of an individual-differences measure of hope. *Journal of Personality and Social Psychology* 60:570-585, 1991
- Spaniol L, Koehler, M, Hutchinson D: The recovery workbook: Practical coping and empowerment strategies for people with psychiatric disability, Revised edition. Boston: Boston University, Center for Psychiatric Rehabilitation, 2009
- Uniformed Mental Health Services Handbook (VHA HANDBOOK 1160.010. June 11, 2008
- VA Mental Health Consumer Council. VHA mental health strategic plan. Consumer Council Newsletter 7:1-2, 2004
- Ware JE, Kosinski M, Keller S. A 12-item short-form health survey (SF-12): construction of scales and preliminary tests of reliability and validity. *Medical Care* 24:220-233, 1996

Young AS, Forquer SL, Tran A, et al: Identifying clinical competencies that support rehabilitation and empowerment in individuals with severe mental illness. *Journal of Behavioral Health Services & Research* 27:321-333, 2000

Zimmerman MA, Warschausky S: Empowerment theory for rehabilitation research: conceptual and methodological issues. *Rehabilitation Psychology* 43:3-16, 1998





## Supplemental Table

## Recovery and traditional mental health outcomes at enrollment and 3-month follow up

|                             | Peer-led (n=74) |       |          |       | Clinician-led (n=82) |       |          |       | Treatment as Usual (n=84) |       |          |       |
|-----------------------------|-----------------|-------|----------|-------|----------------------|-------|----------|-------|---------------------------|-------|----------|-------|
|                             | Enrollment      |       | 3-months |       | Enrollment           |       | 3-months |       | Enrollment                |       | 3-months |       |
| Recovery Outcomes           | Mean            | s.d.  | Mean     | s.d.  | Mean                 | s.d.  | Mean     | s.d.  | Mean                      | s.d.  | Mean     | s.d.  |
| Patient Activation (PAM)    | 28.92           | 5.85  | 29.12    | 5.91  | 28.38                | 5.42  | 28.82    | 6.48  | 28.90                     | 5.92  | 29.21    | 5.80  |
| Empowerment                 | 80.19           | 7.43  | 80.20    | 6.66  | 80.11                | 7.41  | 80.85    | 8.00  | 80.31                     | 7.81  | 81.15    | 8.37  |
| Social Support              | 61.35           | 16.87 | 63.18    | 16.59 | 57.89                | 17.92 | 58.21    | 19.00 | 61.74                     | 18.20 | 64.30    | 16.31 |
| Hope                        | 23.40           | 3.09  | 23.51    | 3.69  | 23.72                | 4.11  | 24.10    | 4.02  | 23.42                     | 4.10  | 23.77    | 4.13  |
| Recovery Assessment Scale   | 163.7           | 19.11 | 164.2    | 20.07 | 163.8                | 20.29 | 164.7    | 22.19 | 163.8                     | 23.81 | 166.5    | 22.47 |
| Traditional Outcomes        |                 |       |          |       |                      |       |          |       |                           |       |          |       |
| VR-12 MCS*                  | 44.78           | 12.34 | 47.16    | 12.41 | 42.06                | 14.33 | 44.57    | 13.30 | 42.83                     | 13.88 | 47.18    | 12.80 |
| BASIS-24 Summary Score*     | 1.14            | 0.62  | 1.09     | 0.65  | 1.31                 | 0.71  | 1.24     | 0.66  | 1.24                      | 0.75  | 1.08     | 0.65  |
| Depression/Functioning*     | 1.33            | 0.89  | 1.30     | 0.90  | 1.49                 | 1.02  | 1.38     | 0.95  | 1.39                      | 0.97  | 1.21     | 0.87  |
| Interpersonal Relationships | 1.45            | 0.85  | 1.28     | 0.76  | 1.43                 | 0.89  | 1.50     | 0.82  | 1.46                      | 0.92  | 1.26     | 0.85  |
| Self-Harm                   | 0.22            | 0.48  | 0.18     | 0.50  | 0.27                 | 0.68  | 0.22     | 0.57  | 0.28                      | 0.64  | 0.18     | 0.46  |
| Emotional Lability          | 1.39            | 1.02  | 1.32     | 1.06  | 1.69                 | 1.14  | 1.64     | 0.97  | 1.62                      | 1.06  | 1.49     | 0.95  |
| Psychotic Symptoms*         | 0.59            | 0.78  | 0.58     | 0.87  | 0.96                 | 1.06  | 0.84     | 0.96  | 0.85                      | 1.01  | 0.66     | 0.87  |
| Alcohol/Drug Use            | 0.44            | 0.63  | 0.51     | 0.62  | 0.66                 | 0.76  | 0.70     | 0.89  | 0.61                      | 0.80  | 0.56     | 0.83  |

Outcome Measure Ranges: Patient Activation 0-52; Empowerment 28-112; Social Support 19-95; Hope 12-48; Recovery Activation 42-210

MCS 0-100; higher values indicate better mental health; BASIS-24 0-4; higher values indicate greater symptom severity

\*Statistically significant effect of time (p<.05)
